# Supplementary material for: Hepatitis B testing and treatment in HIV patients in The Gambia—Compliance with international guidelines and clinical outcomes
Source: PLoS One. 2017 Jun 14;12(6):e0179025. doi: 10.1371/journal.pone.0179025 (PMC5470698; doi:10.1371/journal.pone.0179025)
Supplement: S1 File — (XLSX) [file pone.0179025.s001.xlsx]

## Sheet: Clean dataset
EG #	HBsAg	Sex	Age	Height (m)	Weight (Kg)	BMI (Kg/m2)	HIV_Diagnosis	DurationSinceDiagnosis (months)	TypeOfDiagnosis	InitialCD4Count	RecentCD4Count	HIV Viral Load (copies/mL)	ARVs	AZT duration (months)	3TC duration (months)	NVP duration (months)	EFV duration (months)	TDF duration (months)	ABC duration (months)	LPV/r duration (months)	D4T duration (months)	DDI duration (months)	HerbalRemedy	OtherMedications	HBV DNA IU/mL	HB	Platelets	Creatinine	AST	ALT	ALK PHOS	GGT	MStiff (kPa)	APRI	FIB-4	Steatosis on USS	M204V/I	V173L	L180M
6000	Positive	Male	50	1.58	73.7	29.5225	1	90	1	80	752	0	1	86	86	86	0	0	0	0	0	0	0	1	213	12.4	263	54	24	13	110	57	2.9	0.198	1.27	0	0	0	0
6001	Positive	Female	38	1.67	61.6	22.0876	1	52	0	.	.	.	1	52	52	52	0	0	0	0	0	0	0	1	268	12.1	156	51	23	9	102	22	3.7	0.321	1.87	0	0	0	0
6002	Positive	Female	37	1.53	38.3	16.3612	1	2	1	346	.	104439	1	2	2	2	0	0	0	0	0	0	0	1	44525	8.8	118	40	57	6	226	179	5.5	1.05	7.3	0	0	0	0
6003	Positive	Female	50	1.55	39.1	16.2747	1	27	4	426	702	.	1	11	11	0	0	0	11	0	0	0	.	1	274	12	209	45	16	11	42	20	.	0.166	1.15	0	0	0	0
6004	Positive	Female	31	1.6	42.9	16.7578	1	20	4	74	211	.	1	18	18	18	0	0	0	0	0	0	0	1	134615	9.7	317	32	26	5	78	47	.	0.178	1.14	0	0	0	0
6005	Positive	Female	50	1.63	50.9	19.1577	1	12	4	554	554	0	1	12	12	12	0	0	0	0	0	0	0	1	446	12.3	192	61	19	6	39	26	.	0.215	2.02	0	0	0	0
6006	Positive	Female	37	1.65	47.8	17.5574	1	21	4	568	513	77422	1	14	14	0	0	0	14	0	0	0	0	1	3727	11.7	161	53	22	24	81	27	.	0.297	1.03	0	0	0	0
6007	Positive	Male	46	1.8	65.4	20.1852	1	40	1	42	714	0	1	20	20	20	0	0	0	0	0	0	0	1	7206232	14.2	238	75	41	46	80	72	7.1	0.374	1.17	0	1	0	1
6008	Positive	Male	34	1.76	80.8	26.0847	1	15	1	299	327	0	1	13	13	13	0	0	0	0	0	0	0	1	30	14.2	160	93	27	22	86	67	7.9	0.367	1.22	0	0	0	0
6009	Positive	Female	60	1.62	47.1	17.947	1	67	2	540	459	.	1	32	32	32	0	0	0	0	0	0	0	1	301	12.5	194	58	21	14	60	39	8.7	0.235	1.74	0	0	0	0
6010	Positive	Female	35	1.61	70.2	27.0823	1	45	4	1227	1121	.	1	20	20	0	0	0	20	0	0	0	0	1	149	12.4	200	44	19	20	93	30	3.5	0.207	0.74	0	0	0	0
6011	Positive	Female	43	1.6	87.8	34.2969	1	15	1	157	264	.	1	10	13	13	0	3	0	0	0	0	0	1	1596	11.7	210	63	24	15	109	33	.	0.248	1.27	0	0	0	0
6012	Positive	Female	45	1.55	40	16.6493	1	80	4	439	604	.	1	40	40	40	0	0	0	0	0	0	0	1	12039268	11	147	47	25	8	63	56	4.4	0.37	2.71	0	1	0	1
6013	Positive	Male	40	1.66	60.1	21.8101	3	28	1	33	157	0	1	0	20	0	20	20	0	0	0	0	0	1	11522070	13.5	144	69	70	31	130	75	.	1.057	3.49	0	0	0	0
6014	Positive	Male	35	1.75	63.7	20.8	3	32	1	6	213	0	1	29	29	29	0	0	0	0	0	0	0	1	101	12.9	172	96	23	4	96	34	8.8	0.291	2.34	0	0	0	0
6015	Positive	Female	38	1.73	78.2	26.1285	1	40	1	425	501	0	1	10	10	10	0	0	0	0	0	0	0	1	83	13.3	220	76	29	16	56	62	5.9	0.287	1.25	0	0	0	0
6016	Positive	Male	27	1.8	72	22.2222	3	34	2	540	450	102329	0	0	0	0	0	0	0	0	0	0	1	1	113	13.6	141	82	42	13	89	42	6.8	0.648	2.23	0	0	0	0
6017	Positive	Female	34	1.65	54	19.8347	1	70	4	376	386	.	1	31	31	31	0	0	0	0	0	0	0	1	114	12.1	187	51	23	6	66	27	.	0.267	1.71	0	0	0	0
6018	Positive	Female	54	1.63	51.1	19.2329	1	104	2	190	316	.	1	95	95	83	12	0	0	0	0	0	1	1	361	12.3	127	44	24	15	109	27	3.2	0.411	2.63	0	0	0	0
6019	Positive	Female	53	1.62	56	21.3382	3	39	1	255	429	.	1	36	36	36	0	0	0	0	0	0	0	1	525	9.7	165	49	19	4	83	25	5.3	0.25	3.05	0	0	0	0
6020	Positive	Male	33	1.8	62.9	19.4136	1	111	1	260	328	.	1	101	101	92	9	0	0	0	0	0	0	1	4551	12	234	90	25	16	80	27	4	0.232	0.88	0	0	0	0
6021	Positive	Female	43	1.55	45.1	18.7721	1	10	1	311	394	1217460	1	9	9	9	0	0	0	0	0	0	.	1	324160600	9.7	42	49	47	12	175	26	4.4	2.433	13.89	0	1	0	0
6022	Positive	Female	25	1.54	47.8	20.1552	1	20	1	.	119	0	1	13	13	13	0	0	0	0	0	0	0	1	259	11.3	201	59	28	35	175	89	4.6	0.303	0.59	0	0	0	0
6023	Positive	Female	55	1.55	54	22.4766	.	52	4	.	.	660002	0	0	0	0	0	0	0	0	0	0	0	1	19323	10.2	276	58	36	15	181	113	34.3	0.284	1.85	0	0	0	0
6024	Positive	Female	42	1.64	67	24.9108	1	140	1	470	375	0	1	65	65	54	11	0	0	0	3	0	0	1	63501960	12.7	200	64	35	28	234	72	3.5	0.38	1.39	0	1	1	1
6025	Positive	Female	27	1.7	50	17.301	1	50	4	281	112	.	1	40	40	40	0	0	0	0	0	0	0	1	270	9.5	139	45	22	12	139	64	4.4	0.344	1.23	0	0	0	0
6026	Positive	Female	36	1.6	51	19.9219	1	23	1	284	255	10477	1	20	20	20	0	0	0	0	0	0	0	1	2011	12.4	204	75	45	17	91	24	4.6	0.48	1.93	0	0	0	0
6027	Positive	Female	39	1.6	52	20.3125	.	104	4	.	.	.	0	0	0	0	0	0	0	0	0	0	0	1	1283	12	230	63	25	15	59	23	4.9	0.236	1.09	0	0	0	0
6028	Positive	Male	56	1.7	47	16.263	1	28	1	603	394	.	0	0	0	0	0	0	0	0	0	0	0	1	220	13.5	227	81	36	9	103	24	7.5	0.345	2.96	0	0	0	0
6029	Positive	Male	46	1.66	49	17.782	3	4	1	121	.	0	1	3	3	3	0	0	0	0	0	0	0	1	361	9.8	124	52	28	12	85	40	6.6	0.491	3	0	0	0	0
6030	Positive	Male	38	1.76	57	18.4013	1	14	1	256	147	6376	1	12	12	12	0	0	0	0	0	0	0	1	222	12.1	176	77	21	9	122	33	6.1	0.259	1.51	0	0	0	0
6031	Positive	Male	48	1.8	95	29.321	3	22	1	150	264	0	1	21	21	12	9	0	0	0	0	0	1	1	10255	14	173	66	36	37	100	25	4.7	0.452	1.64	0	0	0	0
6032	Positive	Female	50	1.65	85	31.2213	1	105	4	75	401	0	1	104	104	72	32	0	0	0	0	0	0	1	44235438	13.7	194	46	28	28	164	61	7	0.314	1.36	0	1	1	1
6033	Positive	Female	42	1.65	60	22.0386	1	2	1	73	.	.	1	1	1	0	1	0	0	0	0	0	0	1	.	.	.	.	.	.	.	.	.	.	.	0	0	0	0
6034	Positive	Female	43	1.57	50	20.2848	1	5	2	203	.	.	1	2	2	2	0	0	0	0	0	0	0	.	31892762	12.1	218	56	26	22	66	44	3.3	0.259	1.09	0	0	0	0
6035	Positive	Male	36	1.65	45	16.5289	1	91	2	138	309	0	1	83	83	83	0	0	0	0	0	0	0	1	480	11.7	262	68	22	7	119	34	4.3	0.183	1.14	0	0	0	0
6036	Positive	Female	41	1.55	49	20.3954	3	56	4	489	651	.	1	21	21	0	0	0	21	0	0	0	0	1	998	12	66	54	27	19	104	24	3	0.889	3.85	0	0	0	0
6037	Positive	Female	33	1.68	53	18.7783	1	1	4	.	.	.	0	0	0	0	0	0	0	0	0	0	0	0	6381	9.2	150	50	25	9	100	15	6.6	0.362	1.83	0	0	0	0
6038	Positive	Female	51	1.5	45	20	1	6	1	494	.	85740	0	0	0	0	0	0	0	0	0	0	0	1	722	12	204	43	28	14	63	37	4.9	0.298	1.87	0	0	0	0
6039	Negative	Female	32	1.53	52	22.2137	1	60	2	461	499	0	1	16	16	16	0	0	0	0	0	0	0	1	0	13	242	40	19	12	78	47	3.6	0.171	0.73	0	0	0	0
6040	Negative	Male	42	1.7	66	22.8374	1	5	2	211	.	0	1	3	3	0	3	0	0	0	0	0	1	1	0	11.6	133	76	31	26	69	50	6.6	0.507	1.92	0	0	0	0
6041	Negative	Male	30	1.82	61	18.4157	1	166	1	170	474	0	1	116	116	116	0	0	0	0	0	0	0	1	0	13.2	168	76	24	8	107	55	5.5	0.311	1.52	0	0	0	0
6042	Negative	Female	45	1.6	62	24.2187	1	60	4	310	639	.	1	40	40	40	0	0	0	0	0	0	0	1	0	8.7	240	44	26	3	77	25	3.7	0.236	2.81	0	0	0	0
6043	Positive	Female	51	1.6	57	22.2656	1	205	4	400	643	.	1	33	79	79	0	60	0	60	.	2	1	1	786	11.5	316	39	19	8	158	47	3.8	0.131	1.08	0	0	0	0
6044	Positive	Female	35	1.58	73	29.2421	1	2	1	282	.	.	1	1	1	1	0	0	0	0	0	0	1	1	341	12.4	206	49	35	13	102	55	6.2	0.369	1.65	0	0	0	0
6045	Negative	Female	30	1.6	51	19.9219	1	52	1	21	339	.	1	45	45	43	2	0	0	0	0	0	0	1	0	12.4	148	34	43	52	135	129	4.2	0.632	1.21	0	0	0	0
6046	Negative	Female	35	1.55	35	14.5682	1	5	2	639	.	16753	0	0	0	0	0	0	0	0	0	0	0	1	0	12.4	210	51	26	8	104	42	4.7	0.269	1.53	0	0	0	0
6047	Positive	Female	32	1.68	70	24.8016	1	77	2	288	719	1704	1	71	71	71	0	0	0	0	0	0	0	1	222	12.6	279	70	20	11	89	34	3.6	0.156	0.69	1	0	0	0
6048	Negative	Female	42	1.65	69	25.3444	1	67	4	468	377	0	1	32	32	32	0	0	0	0	0	0	0	1	0	10.7	198	53	24	23	86	50	2.8	0.264	1.06	0	0	0	0
6049	Negative	Female	60	1.6	50	19.5312	1	4	1	323	.	.	1	2	2	2	0	0	0	0	0	0	0	1	0	10.7	162	78	44	45	148	119	4.3	0.59	2.43	0	0	0	0
6050	Negative	Female	34	1.6	48	18.75	3	17	2	488	383	0	1	3	3	3	0	0	0	0	0	0	0	1	0	13.8	179	82	48	44	69	64	5.8	0.583	1.37	0	0	0	0
6051	Negative	Female	35	1.6	41	16.0156	1	66	1	667	403	65313	1	23	23	23	0	0	0	0	0	0	0	1	0	13.4	240	49	25	22	89	42	5	0.226	0.78	0	0	0	0
6052	Negative	Female	38	1.67	70.7	25.3505	1	109	1	90	774	0	1	106	106	106	0	0	0	0	0	0	0	1	0	13.9	238	78	17	12	.	25	.	0.155	0.78	0	0	0	0
6053	Negative	Female	34	1.55	48	19.9792	1	155	4	470	466	0	1	71	71	71	0	0	0	0	0	0	0	1	0	15.5	268	75	25	26	162	66	6.1	0.203	0.64	0	0	0	0
6054	Positive	Female	35	1.62	55	20.9572	1	78	1	357	180	2083837	1	50	50	50	0	0	0	0	0	0	0	1	18098	10.2	230	75	38	16	122	42	6.5	0.359	1.45	0	0	0	0
6055	Negative	Female	42	1.65	90	33.0579	1	73	1	190	759	0	1	68	68	68	0	0	0	0	0	0	0	1	0	11.7	280	55	21	16	89	59	6.8	0.163	0.79	0	0	0	0
6056	Positive	Male	35	1.65	58	21.3039	3	2	1	143	.	414	1	1	1	1	0	0	0	0	0	0	0	1	1849041	12.7	173	88	221	232	181	153	4.8	2.777	2.94	0	0	0	0
6057	Negative	Female	48	1.5	63	28	1	80	1	321	230	39211	1	78	78	78	0	0	0	0	0	0	1	1	0	9	256	52	26	13	151	37	5.7	0.221	1.35	0	0	0	0
6058	Negative	Female	34	1.7	59	20.4152	1	14	1	128	200	0	1	13	13	6	7	0	0	0	0	0	0	1	0	11.6	219	73	44	34	209	385	4.1	0.437	1.17	0	0	0	0
6059	Negative	Male	57	1.7	63	21.7993	1	23	2	329	496	0	1	21	21	21	0	0	0	0	0	0	0	1	0	15.4	176	94	29	29	72	47	6.6	0.358	1.74	0	0	0	0
6060	Negative	Female	45	1.65	55	20.202	1	4	2	306	.	0	1	3	3	3	0	0	0	0	0	0	0	1	0	11.7	157	58	21	20	80	19	5.5	0.291	1.35	0	0	0	0
6061	Negative	Male	42	1.7	54	18.6851	1	66	2	332	650	0	1	.	.	.	.	.	.	.	.	.	0	1	0	14.6	164	64	40	54	99	66	5.2	0.53	1.39	0	0	0	0
6062	Negative	Female	45	1.65	61	22.4059	1	112	1	210	426	0	1	109	109	109	0	0	0	0	0	0	0	1	0	11.2	204	93	17	7	81	39	4.8	0.181	1.42	0	0	0	0
6063	Negative	Female	50	1.6	74	28.9062	1	66	1	80	657	0	1	59	59	59	0	0	0	0	0	0	1	1	0	13.2	192	81	19	12	141	189	7.7	0.215	1.43	0	0	0	0
6064	Negative	Male	49	1.8	77	23.7654	1	68	2	210	398	0	1	67	67	67	0	0	0	0	0	0	0	1	0	16	150	88	37	41	115	77	5.3	0.536	1.89	0	0	0	0
6065	Positive	Female	37	1.55	51	21.2279	.	.	1		.	242788	0	0	0	0	0	0	0	0	0	0	0	1	7850	10.8	220	40	134	67	154	103	6.7	1.324	2.75	0	0	0	0
6066	Negative	Female	39	1.58	55	22.0317	1	60	1	322	338	0	1	64	64	64	0	0	0	0	0	0	0	1	0	12.5	136	68	24	19	118	36	3.6	0.384	1.58	0	0	0	0
6067	Positive	Female	34	1.6	57	22.2656	1	43	4	447	465	0	0	0	0	0	0	0	0	0	0	0	0	1	1248	13.5	56	61	20	14	104	16	4.9	0.776	3.25	0	0	0	0
6068	Positive	Female	50	1.55	61	25.3902	1	1	1	160	.	828	1	1	1	1	1	0	0	0	0	0	0	1	5171	11.6	165	86	60	40	109	24	4.4	0.791	2.87	0	0	0	0
6069	Positive	Female	22	1.65	53	19.4674	1	55	1	597	639	97570	1	11	52	43	9	20	0	0	21	0	1	1	142289678	11.9	204	55	47	31	67	17	4.8	0.501	0.91	0	0	0	0
6070	Positive	Female	28	1.65	64	23.5078	1	13	4	114	292	0	1	5	11	11	0	6	0	0	0	0	0	1	449	11	291	52	17	15	140	20	5.2	0.127	0.42	1	0	0	0
6071	Positive	Female	28	1.63	52	19.5717	1	1	2	386	311	4446	0	0	0	0	0	0	0	0	0	0	1	1	8911	.	.	.	.	.	.	.	4	.	.	0	0	0	0
6072	Positive	Female	48	1.74	83	27.4145	1	44	3	1147	784	536	0	0	0	0	0	0	0	0	0	0	0	1	378	13.8	183	39	21	13	108	.	4.9	0.249	1.53	1	0	0	0
6073	Positive	Female	48	1.64	80	29.7442	1	120	1	340	421	0	1	22	22	22	0	0	0	0	0	0	0	1	185	11.7	198	70	29	24	93	63	5.1	0.318	1.44	0	0	0	0
6074	Negative	Female	48	1.6	70	27.3437	1	36	1	86	264	0	1	34	25	35	0	8	0	2	0	0	0	1	0	12.3	163	66	39	31	68	59	6.1	0.52	2.06	0	0	0	0
6075	Negative	Male	43	1.5	65	28.8889	1	20	2	411	365	0	1	4	4	4	0	0	0	0	0	0	0	1	0	12.6	205	71	33	18	84	70	5.6	0.35	1.63	0	0	0	0
6076	Positive	Female	45	1.65	51	18.7328	2	83	1	250	1532	0	1	77	77	0	0	0	0	77	0	0	0	1	409	15.4	156	58	25	12	.	57	5	0.348	2.08	0	0	0	0
6077	Positive	Female	30	1.7	86	29.7578	1	23	2	360	245	0	1	1	4	4	0	3	0	0	0	0	0	1	512	12.4	158	73	34	43	82	44	3.4	0.468	0.98	0	0	0	0
6078	Positive	Male	49	1.76	63	20.3383	1	27	1	24	163	0	1	26	26	26	0	0	0	0	0	0	0	1	1514	15.9	120	105	25	14	114	49	5.5	0.453	2.73	0	0	0	0
6079	Positive	Male	63	1.66	58	21.048	2	7	3	399	.	0	0	0	0	0	0	0	0	0	0	0	0	1	136967	14.9	120	.	.	.	.	.	5.8	.	.	0	1	0	1
6080	Negative	Female	.	1.65	50	18.3655	1	11	1	201	545	0	1	6	10	10	0	6	0	0	0	0	0	1	0	.	.	.	.	.	.	.	3.2	.	.	0	0	0	0
6081	Positive	Female	37	1.55	76	31.6337	.	.	1	NA	.	0	0	0	0	0	0	0	0	0	0	0	0	.	339499186	.	.	63	43	35	127	131	3.9			1	1	0	1
6082	Positive	Female	37	1.4	55	28.0612	1	11	2	350	.	26972	0	0	0	0	0	0	0	0	0	0	0	1	550	14.1	272	57	24	23	113	31	4.7	0.192	0.68	0	0	0	0
6083	Negative	Female	35	1.6	60	23.4375	1	91	4	682	628	1739	0	0	0	0	0	0	0	0	0	0	0	1	0	12.6	206	53	22	5	104	22	5.3	0.232	1.67	0	0	0	0
6084	Positive	Female	36	1.4	68	34.6939	1	92	1	244	604	0	1	74	74	74	0	0	0	0	0	0	0	1	1571	11.9	259	59	24	19	82	38	3.7	0.201	0.77	0	0	0	0
6085	Negative	Female	34	1.6	52	20.3125	3	78	1	168	230	5876	1	5	5	59	0	35	0	40	0	35	0	1	0	8.8	282	62	19	11	82	20	4.5	0.146	0.69	0	0	0	0
6086	Negative	Female	38	1.5	60	26.6667	1	168	1	198	573	0	1	108	108	97	11	0	0	0	0	0	0	1	0	11.7	180	49	16	11	73	33	3.8	0.193	1.02	1	0	0	0
6087	Negative	Male	53	1.77	81	25.8546	2	99	2	280	953	0	1	76	76	0	0	0	0	76	0	0	1	1	0	14.7	223	68	17	12	95	86	3.6	0.166	1.17	1	0	0	0
6088	Negative	Female	44	1.7	75	25.9516	1	61	1	428	399	24190	1	28	41	39	2	8	0	8	7	0	0	1	0	10	250	42	16	5	149	207	3.1	0.139	1.26	0	0	0	0
6089	Negative	Female	38	1.7	61	21.1073	1	13	4	459	424	32190	0	0	0	0	0	0	0	0	0	0	1	1	0	13.6	189	42	30	27	91	33	5.3	0.345	1.16	1	0	0	0
6090	Positive	Female	50	1.65	60	22.0386	1	68	2	323	226	0	1	60	60	60	0	0	0	0	0	0	1	1	509	11.8	140	55	32	24	87	164	5.3	0.497	2.33	0	0	0	0
6091	Positive	Female	38	1.6	59	23.0469	1	36	1	161	278	0	1	35	35	31	0	0	0	4	0	0	0	1	464	13.1	265	49	24	8	68	28	4.1	0.197	1.22	0	0	0	0
6092	Positive	Female	46	1.53	49	20.9321	1	41	2	147	1013	0	1	39	39	39	0	0	0	0	0	0	0	1	229	12.2	166	44	38	22	124	70	4.7	0.498	2.25	0	0	0	0
6093	Positive	Female	31	1.68	76	26.9274	1	2	2	561	.	217	0	0	0	0	0	0	0	0	0	0	0	1	1394	13.4	228	73	26	12	68	26	7.1	0.248	1.02	0	0	0	0
6094	Positive	Female	44	1.67	68	24.3824	1	9	1	361	853	985970	0	0	0	0	0	0	0	0	0	0	0	1	670	11.9	160	71	54	24	122	15	6.3	0.734	3.03	1	0	0	0
6095	Positive	Female	42	1.6	60	23.4375	3	221	1	180	646	0	1	111	111	0	0	0	0	111	0	0	0	1	417606	13.4	192	50	58	27	169	22	5.9	0.657	2.44	0	1	0	1
6096	Positive	Female	50	1.63	49	18.4425	2	29	1	576	617	0	0	0	0	0	0	0	0	0	0	0	0	1	582	11.5	181	74	26	8	106	17	4.2	0.312	2.54	0	0	0	0
6097	Positive	Female	35	1.55	62	25.8065	1	19	4	.	316	248	1	1	1	1	0	0	0	0	0	0	0	1	509	13.7	152	63	24	8	84	34	4.1	0.343	1.95	0	0	0	0
6098	Positive	Female	40	1.63	50	18.8189	1	84	1	6	153	13114	1	82	82	82	0	0	0	0	0	0	0	1	216	13.3	167	78	34	17	113	27	5	0.443	1.98	0	0	0	0
6099	Positive	Male	47	1.65	50	18.3655	1	66	2	127	196	0	1	64	64	64	0	0	0	0	0	0	0	1	1625	14.8	153	106	37	27	121	106	5.4	0.526	2.19	0	0	0	0
6100	Positive	Female	36	1.7	54	18.6851	1	34	1	4	274	0	1	33	33	33	0	0	0	0	0	0	0	1	3222233	16	122	59	40	26	120	130	9.3	0.713	2.31	0	1	1	1
6101	Positive	Female	31	1.58	47	18.8271	1	66	4	444	449	969	1	22	22	22	0	0	0	0	0	0	0	1	373	14.4	194	69	40	25	52	27	5.3	0.448	1.28	0	0	0	0
6102	Positive	Female	35	1.55	48	19.9792	1	40	4	111	356	1939	1	36	36	36	0	0	0	0	0	0	0	1	2468537	15.8	126	81	44	32	72	85	13.4	0.759	2.16	0	1	0	0
6103	Positive	Female	35	1.65	55	20.202	3	8	1	302	.	7714	1	4	4	4	0	0	0	0	0	0	1	1	6589286	10.9	186	58	49	35	169	34	4.8	0.573	1.56	0	0	0	0
6104	Positive	Female	39	1.6	50	19.5312	3	8	1	737	.	14523	0	0	0	0	0	0	0	0	0	0	0	1	624	15.1	101	96	40	14	111	164	26.3	0.861	4.13	1	0	0	0
6105	Negative	Female	54	1.65	50	18.3655	1	82	4	351	427	51125	1	38	38	38	0	0	0	0	0	0	0	1	0	12	188	55	20	14	63	16	3.6	0.231	1.54	0	0	0	0
6106	Negative	Female	46	1.73	50	16.7062	1	73	1	322	574	851	1	87	87	87	0	0	0	0	0	0	0	1	0	11.9	218	70	24	20	77	33	6.1	0.239	1.13	0	0	0	0
6107	Negative	Male	61	1.67	60	21.5139	1	90	1	135	434	0	1	76	76	76	0	0	0	0	0	0	1	1	0	12.4	140	62	24	23	89	83	3.8	0.373	2.18	0	0	0	0
6108	Negative	Female	44	1.74	80	26.4236	1	82	1	10	670	0	1	80	80	80	0	0	0	0	0	0	1	1	0	12.9	235	71	19	16	107	30	6.1	0.176	0.89	0	0	0	0
6109	Negative	Female	38	1.58	55	22.0317	1	15	1	298	585	47	1	27	35	14	21	8	0	0	0	0	0	1	0	12.9	259	46	25	21	128	90	5	0.21	0.8	0	0	0	0
6110	Positive	Female	51	1.64	58	21.5645	3	51	1	552	780	4600	1	29	30	21	9	1	0	0	0	0	1	1	5370	13.1	230	48	30	19	88	31	5	0.284	1.53	0	0	0	0
6111	Positive	Female	36	1.57	59	23.9361	3	96	4	573	915	0	1	64	64	63	0	0	0	1	0	0	0	1	277	11.5	125	48	23	12	36	28	4.5	0.4	1.91	0	0	0	0
6112	Positive	Female	31	1.67	55	19.721	1	34	2	282	220	13293	1	32	32	32	0	0	0	0	0	0	0	1	281008	12.2	160	54	74	50	70	16	5.9	1.005	2.03	0	0	0	0
6113	Negative	Female	34	1.55	51	21.2279	1	92	1	98	184	16527	1	63	63	63	0	0	0	0	0	0	0	1	0	12.8	214	51	19	7	75	18	5	0.193	1.14	0	0	0	0
6114	Negative	Female	35	1.58	47	18.8271	2	27	1	189	412	0	1	24	24	0	0	0	0	24	0	0	0	1	0	12.3	163	74	15	5	154	19	3.7	0.2	1.44	0	0	0	0
6115	Negative	Female	40	1.5	53	23.5556	.	.	1	.	.	0	0	0	0	0	0	0	0	0	0	0	0	.	0	10.3	142	54	24	17	125	127	5.5	0.367	1.64	0	0	0	0
6116	Negative	Female	35	1.4	48	24.4898	.	.	1	.	.	0	0	0	0	0	0	0	0	0	0	0	0	.	0	12.1	189	63	20	10	137	44	4.7	0.23	1.17	0	0	0	0
6117	Positive	Female	34	1.65	49	17.9982	1	32	1	118	147	.	1	27	27	26	1	0	0	0	0	0	0	1	9409	12	209	42	41	25	152	97	4.9	0.426	1.33	0	0	0	0

## Sheet: Variable definition and ranges
EG #	HBsAg	Sex	Age	BMI (Kg/m2)	HIV_Diagnosis	DurationSinceDiagnosis (months)	TypeOfDiagnosis	InitialCD4Count	RecentCD4Count	HIV Viral Load (copies/mL)	ARVs	AZT duration (months)	3TC duration (months)	NVP duration (months)	EFV duration (months)	TDF duration (months)	ABC duration (months)	LPV/r duration (months)	D4T duration (months)	DDI duration (months)	HerbalRemedy	OtherMedications	HBV DNA IU/mL	HB	Platelets	AST	ALT	ALK PHOS	GGT	MStiff (kPa)	APRI	FIB-4	Steatosis on USS
6000 - 6117	Positive	Male	18 - 70	1950-10-01	1 = HIV 1	0 - 1000	1 = Symptomatic	0 - 1,500	0 - 1,500	0 - infinity	1 = Yes	0 - 100	0 - 100	0 - 100	0 - 100	0 - 100	0 - 100	0 - 100	0 - 100	0 - 100	0 = No	0 = No	0 - infinity	1 to 20	1 - 500	0 - infinity	0 - infinity	0 - infinity	0 - infinity	1 to 75	0 - 10	0 - 30	0 = NO
	Negative	Female			2 = HIV 2		2 = Contact screening			0 = undetectable	2 = No										1 = Yes	1 = Yes											1 = Yes
					3 = HIV1+HIV2		3 = Routine Screening
							4 = PMTCT
							0 = Don't know
